# Supplementary material
Source: PubMed Central journal article supplement (PMC3724231)
Supplement: NIHMS484870-supplement-01.pdf [file NIHMS484870-supplement-01.pdf]

**Table S1. Distribution of Sociodemographic Factors in the National Comorbidity Survey Replication Adolescent Supplement (NCS-A) (n=6,483)**

|    | Demographic                                | Unweighted n | Unweighted % | Weighted % | Weighted SE |
|----|--------------------------------------------|--------------|--------------|------------|-------------|
| 9  | Gender                                     |              |              |            |             |
| 10 | Male                                       | 3,150        | 48.6         | 51.2       | 1.1         |
| 11 | Female                                     | 3,333        | 51.4         | 48.8       | 1.1         |
| 12 | Age                                        |              |              |            |             |
| 13 | 13                                         | 1,114        | 17.2         | 15.3       | 1.6         |
| 14 | 14                                         | 1,497        | 23.1         | 20.6       | 1.2         |
| 15 | 15                                         | 1,240        | 19.1         | 21.2       | 1.0         |
| 16 | 16                                         | 1,288        | 19.9         | 20.7       | 1.3         |
| 17 | 17+                                        | 1,344        | 20.7         | 22.2       | 1.2         |
| 18 | Race/ethnicity                             |              |              |            |             |
| 19 | Hispanic                                   | 758          | 11.7         | 14.4       | 1.3         |
| 20 | Non-Hispanic Black                         | 1,097        | 16.9         | 15.1       | 1.0         |
| 21 | Other                                      | 371          | 5.7          | 5.0        | 0.5         |
| 22 | Non-Hispanic White                         | 4,257        | 65.7         | 65.6       | 1.8         |
| 23 | Parent education                           |              |              |            |             |
| 24 | Parent Education < College                 | 2,598        | 40.1         | 41.7       | 1.5         |
| 25 | Parent Education >= College                | 3,885        | 59.9         | 58.3       | 1.5         |
| 26 | Poverty                                    |              |              |            |             |
| 27 | <= 3 times the poverty                     | 2,143        | 33.1         | 33.8       | 1.5         |
| 28 | > 3 times the poverty line for family size | 4,340        | 66.9         | 66.2       | 1.5         |
| 29 | Urbanicity                                 |              |              |            |             |
| 30 | Metro/other urban                          | 4,887        | 75.4         | 85.2       | 2.4         |
| 31 | Rural                                      | 1,596        | 24.6         | 14.8       | 2.4         |
| 32 | Biological parents in home                 |              |              |            |             |
| 33 | <=1 (birth parents living with)            | 2,812        | 43.4         | 45.3       | 1.5         |
| 34 | 2 (birth parents living with)              | 3,671        | 56.6         | 54.7       | 1.5         |
| 35 | Nativity                                   |              |              |            |             |
| 36 | US Born                                    | 6,286        | 97.0         | 93.7       | 0.7         |
| 37 | Foreign Born                               | 197          | 3.0          | 6.3        | 0.7         |

**Table S2. Number of Respondents With Exposure to Potentially Traumatic Experiences (PTEs) and With *DSM-IV/CIDI* Posttraumatic Stress Disorder (PTSD) in the National Comorbidity Survey Replication Adolescent Supplement (NCS-A) (n=6,483)**

|                                      | Lifetime PTE exposure <sup>a</sup> | Event chosen as worst among those exposed <sup>b</sup> | Lifetime PTSD among all those exposed to the PTE <sup>c</sup> | Lifetime PTSD among all who chose the PTE as their worst <sup>d</sup> |
|--------------------------------------|------------------------------------|--------------------------------------------------------|---------------------------------------------------------------|-----------------------------------------------------------------------|
|                                      | n                                  | n                                                      | n                                                             | n                                                                     |
| Any PTE                              | 3,898                              | 3,898                                                  | 289                                                           | 289                                                                   |
| <b>PTE type</b>                      |                                    |                                                        |                                                               |                                                                       |
| <b>I. Interpersonal violence</b>     |                                    |                                                        |                                                               |                                                                       |
| Kidnapped                            | 39                                 | 8                                                      | 12                                                            | 2                                                                     |
| Physical abuse by caregiver          | 110                                | 42                                                     | 30                                                            | 12                                                                    |
| Physical assault by romantic partner | 45                                 | 9                                                      | 17                                                            | 3                                                                     |
| Other physical assault               | 286                                | 107                                                    | 28                                                            | 5                                                                     |
| Mugged/threatened with weapon        | 425                                | 138                                                    | 41                                                            | 5                                                                     |
| Rape                                 | 163                                | 74                                                     | 63                                                            | 36                                                                    |
| Sexual assault                       | 223                                | 90                                                     | 62                                                            | 21                                                                    |
| Stalked                              | 288                                | 97                                                     | 51                                                            | 8                                                                     |
| Witnessed domestic violence          | 446                                | 186                                                    | 65                                                            | 13                                                                    |
| <b>II. Accidents</b>                 |                                    |                                                        |                                                               |                                                                       |
| Automobile accident                  | 459                                | 225                                                    | 48                                                            | 10                                                                    |
| Other life-threatening accident      | 496                                | 204                                                    | 43                                                            | 8                                                                     |
| Man-made/natural disaster            | 865                                | 415                                                    | 54                                                            | 2                                                                     |
| Life-threatening illness             | 405                                | 193                                                    | 28                                                            | 1                                                                     |
| Accidentally harmed others           | 63                                 | 15                                                     | 5                                                             | 0                                                                     |
| <b>III. Network/witnessing</b>       |                                    |                                                        |                                                               |                                                                       |
| Unexpected death of loved one        | 1872                               | 1,197                                                  | 172                                                           | 96                                                                    |
| PTE to loved one                     | 590                                | 239                                                    | 77                                                            | 5                                                                     |
| Witnessed death/injury               | 716                                | 289                                                    | 74                                                            | 18                                                                    |
| <b>IV. Other</b>                     |                                    |                                                        |                                                               |                                                                       |
| Other event                          | 444                                | 210                                                    | 63                                                            | 19                                                                    |
| Private event                        | 353                                | 160                                                    | 74                                                            | 25                                                                    |

Note: <sup>a</sup>Estimates reported are the number of the 6,483 youths in the total sample who ever experienced each of the PTEs

<sup>b</sup>Respondents with a lifetime PTE were asked to select the worst PTE (i.e., the PTE associated with the worst symptoms).

PTSD was queried in relation to this worst PTE. Respondents with only one PTE were asked about that PTE; respondents with multiple PTEs who were unable to identify a worst event were assigned one using a random number generator.

<sup>c</sup>Number of respondents that meet criteria for lifetime PTSD among those exposed to each PTE.

<sup>d</sup>Number of respondents that meet criteria for lifetime PTSD among those who selected a PTE as their worst.

**Table S3. Associations (Odds Ratios) of Sociodemographics and Prior Mental Disorders With Exposure to Interpersonal Violence Potentially Traumatic Experiences (PTEs) in the National Comorbidity Survey Replication Adolescent Supplement (NCS-A)<sup>a</sup> (n=6,483)**

|                               | Kidnapped |            | Physical abuse by caregiver |            | Physical assault by romantic partner |                    | Other physical assault/ Mugged/threatened with weapon <sup>2</sup> |             | Rape/ Sexual assault <sup>b</sup> |            | Stalked |                     | Witnessed domestic violence |           |
|-------------------------------|-----------|------------|-----------------------------|------------|--------------------------------------|--------------------|--------------------------------------------------------------------|-------------|-----------------------------------|------------|---------|---------------------|-----------------------------|-----------|
|                               | OR        | (95% CI)   | OR                          | (95% CI)   | OR                                   | (95% CI)           | OR                                                                 | (95% CI)    | OR                                | (95% CI)   | OR      | (95% CI)            | OR                          | (95% CI)  |
| Person-year                   |           |            |                             |            |                                      |                    |                                                                    |             |                                   |            |         |                     |                             |           |
| 5–10 years                    | 0.2*      | (0.1–0.5)  | 0.8                         | (0.4–1.6)  |                                      |                    | 4.5*                                                               | (2.1–9.7)   | 2.8*                              | (1.6–4.9)  |         |                     | 1.2                         | (0.8–1.8) |
| 11–13 years                   | 0.0*      | (0.0–0.2)  | 0.8                         | (0.4–1.8)  |                                      |                    | 14.8*                                                              | (8.1–27.0)  | 3.9*                              | (2.2–6.9)  | 18.1*   | (8.0–41.1)          | 0.8                         | (0.5–1.2) |
| 14–15 years                   | 0.0*      | (0.0–0.1)  | 0.1*                        | (0.0–0.4)  | 7.5*                                 | (1.9–30.0)         | 21.3*                                                              | (11.1–41.1) | 4.6*                              | (2.4–9.0)  | 45.3*   | (20.3–100.9)        | 0.6*                        | (0.4–1.0) |
| 16+ years                     | 0.1*      | (0.0–0.4)  | 0.0*                        | (0.0–0.0)  | 4.0                                  | (0.9–17.2)         | 17.6*                                                              | (8.3–37.7)  | 2.8*                              | (1.1–7.1)  | 34.4*   | (13.0–90.6)         | 0.0*                        | (0.0–0.2) |
| 1–4 years                     | 1.0       | —          | 1.0                         | —          | 1.0                                  | —                  | 1.0                                                                | —           | 1.0                               | —          | 1.0     | —                   | 1.0                         | —         |
| $\chi^2_4$ (p-value)          |           | 47.3*      |                             | 7765.3*    |                                      | $\chi^2_2 = 8.2^*$ |                                                                    | 162.4*      |                                   | 24.9*      |         | $\chi^2_3 = 90.8^*$ |                             | 30.5*     |
| Sex                           |           |            |                             |            |                                      |                    |                                                                    |             |                                   |            |         |                     |                             |           |
| Females                       | 1.1       | (0.4–2.9)  | 1.0                         | (0.6–1.6)  | 7.0*                                 | (2.3–21.5)         | 0.3*                                                               | (0.2–0.4)   | 13.6*                             | (8.1–22.7) | 4.5*    | (2.5–8.2)           | 1.2                         | (0.9–1.7) |
| Males                         | 1.0       | —          | 1.0                         | —          | 1.0                                  | —                  | 1.0                                                                | —           | 1.0                               | —          | 1.0     | —                   | 1.0                         | —         |
| $\chi^2_1$                    |           | 0.1        |                             | 0.0        |                                      | 11.7*              |                                                                    | 50.1*       |                                   | 97.7*      |         | 24.3*               |                             | 1.4       |
| Race/ethnicity                |           |            |                             |            |                                      |                    |                                                                    |             |                                   |            |         |                     |                             |           |
| Hispanic                      | 0.6       | (0.1–2.7)  | 0.7                         | (0.3–1.8)  | 6.1*                                 | (2.0–18.9)         | 1.7*                                                               | (1.1–2.6)   | 0.9                               | (0.5–1.6)  | 2.3*    | (1.2–4.4)           | 0.8                         | (0.5–1.5) |
| Non-Hispanic Black            | 0.2*      | (0.1–0.8)  | 0.3*                        | (0.1–0.8)  | 0.3                                  | (0.1–1.6)          | 0.9                                                                | (0.6–1.2)   | 0.5*                              | (0.3–0.9)  | 1.9*    | (1.1–3.3)           | 0.6*                        | (0.4–0.9) |
| Other                         | 0.7       | (0.2–2.4)  | 1.0                         | (0.4–2.6)  | 0.8                                  | (0.2–3.2)          | 1.8*                                                               | (1.1–3.0)   | 1.4                               | (0.6–3.0)  | 1.5     | (0.6–3.5)           | 1.8                         | (0.9–3.4) |
| Non-Hispanic White            | 1.0       | —          | 1.0                         | —          | 1.0                                  | —                  | 1.0                                                                | —           | 1.0                               | —          | 1.0     | —                   | 1.0                         | —         |
| $\chi^2_3$                    |           | 5.6        |                             | 5.4        |                                      | 13.5*              |                                                                    | 21.4*       |                                   | 6.0        |         | 7.6                 |                             | 13.3*     |
| Parent education <sup>c</sup> |           |            |                             |            |                                      |                    |                                                                    |             |                                   |            |         |                     |                             |           |
| No college                    | 2.0       | (0.7–6.1)  | 1.2                         | (0.7–2.1)  | 0.7                                  | (0.3–1.6)          | 1.1                                                                | (0.9–1.5)   | 1.2                               | (0.9–1.7)  | 0.8     | (0.6–1.2)           | 1.4*                        | (1.1–1.7) |
| Some college                  | 1.0       | —          | 1.0                         | —          | 1.0                                  | —                  | 1.0                                                                | —           | 1.0                               | —          | 1.0     | —                   | 1.0                         | —         |
| $\chi^2_1$                    |           | 1.5        |                             | 0.3        |                                      | 0.8                |                                                                    | 0.8         |                                   | 1.7        |         | 0.9                 |                             | 6.9*      |
| Poverty <sup>d</sup>          |           |            |                             |            |                                      |                    |                                                                    |             |                                   |            |         |                     |                             |           |
| High poverty                  | 0.6       | (0.2–2.1)  | 0.8                         | (0.4–1.4)  | 0.4                                  | (0.1–1.5)          | 1.3*                                                               | (1.0–1.7)   | 1.0                               | (0.7–1.4)  | 1.2     | (0.8–1.7)           | 1.7*                        | (1.2–2.5) |
| Low poverty                   | 1.0       | —          | 1.0                         | —          | 1.0                                  | —                  | 1.0                                                                | —           | 1.0                               | —          | 1.0     | —                   | 1.0                         | —         |
| $\chi^2_1$                    |           | 0.7        |                             | 0.8        |                                      | 1.8                |                                                                    | 4.0*        |                                   | 0.0        |         | 0.9                 |                             | 7.8*      |
| Urbanicity                    |           |            |                             |            |                                      |                    |                                                                    |             |                                   |            |         |                     |                             |           |
| Metro/other urban             | 0.8       | (0.3–2.4)  | 1.7*                        | (1.1–2.7)  | 1.1                                  | (0.3–3.5)          | 1.1                                                                | (0.7–1.6)   | 1.1                               | (0.7–1.7)  | 1.0     | (0.6–1.5)           | 1.4                         | (1.0–1.9) |
| Rural                         | 1.0       | —          | 1.0                         | —          | 1.0                                  | —                  | 1.0                                                                | —           | 1.0                               | —          | 1.0     | —                   | 1.0                         | —         |
| $\chi^2_1$                    |           | 0.1        |                             | 5.3*       |                                      | 0.0                |                                                                    | 0.2         |                                   | 0.1        |         | 0.0                 |                             | 3.3       |
| Biological parents in home    |           |            |                             |            |                                      |                    |                                                                    |             |                                   |            |         |                     |                             |           |
| ≤1                            | 24.2*     | (8.9–65.8) | 8.1*                        | (3.4–19.8) | 0.5                                  | (0.2–1.6)          | 1.7*                                                               | (1.3–2.4)   | 3.1*                              | (2.0–4.7)  | 0.8     | (0.5–1.1)           | 4.5*                        | (2.4–8.5) |

|    |                                     |       |            |       |           |       |           |        |           |       |           |
|----|-------------------------------------|-------|------------|-------|-----------|-------|-----------|--------|-----------|-------|-----------|
| 1  |                                     |       |            |       |           |       |           |        |           |       |           |
| 2  |                                     |       |            |       |           |       |           |        |           |       |           |
| 3  |                                     |       |            |       |           |       |           |        |           |       |           |
| 4  | 2                                   | 1.0   | —          | 1.0   | —         | 1.0   | —         | 1.0    | —         | 1.0   | —         |
| 5  | $\chi^2_1$                          | 39.0* |            | 21.5* |           | 1.2   |           | 12.4*  |           | 26.5* |           |
| 6  | Nativity                            |       |            |       |           |       |           |        |           |       |           |
| 7  | Foreign-born                        | 3.2   | (0.6–16.2) | 2.0   | (0.5–7.6) | 0.1*  | (0.0–0.6) | 0.8    | (0.4–1.6) | 0.7   | (0.2–3.1) |
| 8  | U.S. born                           | 1.0   | —          | 1.0   | —         | 1.0   | —         | 1.0    | —         | 1.0   | —         |
| 9  | $\chi^2_1$                          | 2.0   |            | 1.1   |           | 7.2*  |           | 0.4    |           | 0.2   |           |
| 10 | Prior mental disorders <sup>e</sup> |       |            |       |           |       |           |        |           |       |           |
| 11 | Fear                                | 0.9   | (0.4–2.2)  | 1.2   | (0.8–1.8) | 1.4   | (1.0–2.1) | 1.3*   | (1.1–1.7) | 1.1   | (0.9–1.4) |
| 12 | Distress                            | 1.5   | (0.7–3.1)  | 1.1   | (0.6–1.8) | 2.1*  | (1.1–3.7) | 1.2    | (0.9–1.6) | 1.5*  | (1.1–1.9) |
| 13 | Behavior                            | 0.8   | (0.5–1.3)  | 1.6*  | (1.1–2.4) | 3.4*  | (1.9–5.9) | 1.5*   | (1.3–1.7) | 1.8*  | (1.4–2.3) |
| 14 | Substance                           | 3.5*  | (1.0–11.9) | 0.5   | (0.1–2.9) | 2.5*  | (1.2–5.0) | 2.0*   | (1.4–2.8) | 0.8   | (0.4–1.5) |
| 15 | Bipolar                             | 3.4*  | (1.0–11.1) | 0.7   | (0.1–4.7) | 0.7   | (0.2–3.2) | 1.2    | (0.8–1.8) | 2.1*  | (1.1–4.0) |
| 16 | $\chi^2_5$                          | 7.3   |            | 13.8* |           | 83.4* |           | 145.2* |           | 81.3* |           |
| 17 |                                     |       |            |       |           |       |           |        |           |       |           |
| 18 |                                     |       |            |       |           |       |           |        |           |       |           |
| 19 |                                     |       |            |       |           |       |           |        |           |       |           |

20 Note: <sup>a</sup>Models were estimated using discrete-time survival analysis with person-years as the unit of analysis.  
 21 <sup>b</sup>Based on preliminary analysis showing similar patterns of association of predictors with specific PTEs, PTEs were combined for analysis. To do so, we created a consolidated data file that stacked each  
 22 of the separate PTE-specific person-year data arrays and included dummy variables to distinguish among the files, thereby forcing the estimated slopes of PTE exposure on predictors to be constant  
 23 across the combined PTEs in each file. Results are based on these consolidated data arrays.  
 24 <sup>c</sup>Parent education was dichotomized based on highest education of either parent into high school diploma or less versus enrollment or completion of at least some post-high school education (reference  
 25 group).  
 26 <sup>d</sup>Poverty was defined using household family income for the past-year relative to the federally defined poverty line based on family size. Poverty was defined as less than three times the poverty line and  
 27 low poverty (reference group) as three or more times the poverty level.  
 28 <sup>e</sup>Variables represent counts of fear, distress, behavior, substance, and bipolar disorders with onsets prior to first occurrence of each PTE.  
 29 \*Significant at the .05 level, 2-sided test

29  
30  
31  
32  
33  
34  
35  
36  
37  
38  
39  
40  
41  
42  
43  
44  
45  
46  
47  
48  
49



|    |                                     |       |           |       |           |       |           |       |           |       |           |       |           |      |           |
|----|-------------------------------------|-------|-----------|-------|-----------|-------|-----------|-------|-----------|-------|-----------|-------|-----------|------|-----------|
| 1  |                                     |       |           |       |           |       |           |       |           |       |           |       |           |      |           |
| 2  |                                     |       |           |       |           |       |           |       |           |       |           |       |           |      |           |
| 3  |                                     |       |           |       |           |       |           |       |           |       |           |       |           |      |           |
| 4  | $\chi^2_1$                          | 2.3   |           | 3.7   |           | 2.9   |           | 9.4*  |           | 4.4*  |           | 2.4   | 4.1*      |      |           |
| 5  | Nativity                            |       |           |       |           |       |           |       |           |       |           |       |           |      |           |
| 6  | Foreign-born                        | 1.4   | (0.8–2.4) | 0.4*  | (0.2–0.8) | 1.0   | (0.6–1.6) | 0.7   | (0.4–1.1) | 0.5   | (0.2–1.3) | 0.9   | (0.4–1.9) | 2.0* | (1.3–3.2) |
| 7  | U.S. born                           | 1.0   | —         | 1.0   | —         | 1.0   | —         | 1.0   | —         | 1.0   | —         | 1.0   | —         | 1.0  | —         |
| 8  | $\chi^2_1$                          | 1.1   |           | 6.1*  |           | 0.0   |           | 2.1   |           | 2.0   |           | 0.0   | 10.4*     |      |           |
| 9  | Prior mental disorders <sup>e</sup> |       |           |       |           |       |           |       |           |       |           |       |           |      |           |
| 10 | Fear                                | 1.2   | (1.0–1.6) | 1.2   | (1.0–1.4) | 1.3*  | (1.1–1.6) | 1.3*  | (1.1–1.5) | 1.2*  | (1.0–1.4) | 1.3*  | (1.1–1.6) | 1.2* | (1.1–1.4) |
| 11 | Distress                            | 1.2   | (0.9–1.6) | 1.6*  | (1.3–2.1) | 0.8   | (0.6–1.0) | 1.0   | (0.8–1.2) | 1.4*  | (1.1–1.8) | 1.4*  | (1.1–1.7) | 1.3* | (1.0–1.6) |
| 12 | Behavior                            | 1.1   | (0.9–1.3) | 1.3*  | (1.1–1.5) | 1.1   | (0.8–1.5) | 1.2*  | (1.1–1.4) | 1.4*  | (1.2–1.8) | 1.1   | (0.9–1.4) | 1.5* | (1.3–1.9) |
| 13 | Substance                           | 1.7*  | (1.2–2.4) | 0.7   | (0.4–1.2) | 1.2   | (0.5–2.7) | 1.1   | (0.9–1.3) | 1.2   | (0.9–1.7) | 1.7*  | (1.2–2.5) | 2.2* | (1.6–3.2) |
| 14 | Bipolar                             | 0.7   | (0.4–1.5) | 1.2   | (0.6–2.6) | 1.5   | (0.6–4.1) | 1.0   | (0.7–1.4) | 1.1   | (0.7–1.9) | 0.8   | (0.5–1.3) | 1.5  | (1.0–2.3) |
| 15 | $\chi^2_5$                          | 26.3* |           | 61.1* |           | 21.8* |           | 33.5* |           | 59.9* |           | 35.8* | 167.1*    |      |           |
| 16 |                                     |       |           |       |           |       |           |       |           |       |           |       |           |      |           |
| 17 |                                     |       |           |       |           |       |           |       |           |       |           |       |           |      |           |

18

19 Note: <sup>a</sup>Models were estimated using discrete-time survival analysis with person-years as the unit of analysis.

20 <sup>b</sup>Based on preliminary analysis showing similar patterns of association of predictors with specific experiences, PTEs were combined for analysis. To do so, we created a consolidated data file that stacked

21 each of the separate PTE-specific person-year data arrays and included dummy variables to distinguish among the files, thereby forcing the estimated slopes of PTE exposure on predictors to be constant

22 across the combined PTEs in each file. Results are based on these consolidated data arrays.

23 <sup>c</sup>Parent education was dichotomized based on highest education of either parent into high school diploma or less versus enrollment or completion of at least some post-high school education (reference

24 group).

25 <sup>d</sup>Poverty was defined using household family income for the past-year relative to the federally defined poverty line based on family size. Poverty was defined as less than 3 times the poverty line and low

26 poverty (reference group) as three or more times the poverty level.

27 <sup>e</sup>Variables represent counts of fear, distress, behavior, substance, and bipolar disorders with onsets prior to first occurrence of each PTE.

28 \*Significant at the .05 level, 2-sided test

29

30

31

32

33

34

35

36

37

38

39

40

41

42

43

44

45

46

47

48

49

**Table S5. Associations (Odds Ratios) of Sociodemographics, Prior Mental Disorders, and Potentially Traumatic Experience (PTE) Types With *DSM-IV/CIDI* Posttraumatic Stress Disorder (PTSD) Onset in the National Comorbidity Survey Replication Adolescent Supplement (NCS-A)<sup>a</sup> (n=6,483)**

|                               | Total Sample (n=6,483)        |           |                                                             |           | Trauma-Exposed Adolescents (n=3,898) |           |                                               |           |                                                                |           |                                                                                           |           |
|-------------------------------|-------------------------------|-----------|-------------------------------------------------------------|-----------|--------------------------------------|-----------|-----------------------------------------------|-----------|----------------------------------------------------------------|-----------|-------------------------------------------------------------------------------------------|-----------|
|                               | Model 1:<br>Sociodemographics |           | Model 2:<br>Sociodemographics,<br>Prior mental<br>disorders |           | Model 3:<br>Sociodemographics        |           | Model 4:<br>Sociodemographics,<br>Worst event |           | Model 5:<br>Sociodemographics,<br>Worst event,<br>Prior trauma |           | Model 6:<br>Sociodemographics,<br>Worst event, Prior<br>trauma, Prior mental<br>disorders |           |
|                               | OR                            | (95% CI)  | OR                                                          | (95% CI)  | OR                                   | (95% CI)  | OR                                            | (95% CI)  | OR                                                             | (95% CI)  | OR                                                                                        | (95% CI)  |
| Person-year                   |                               |           |                                                             |           |                                      |           |                                               |           |                                                                |           |                                                                                           |           |
| 5–10 years                    | 0.6                           | (0.3–1.1) | 0.4*                                                        | (0.2–0.9) | 0.6                                  | (0.3–1.2) | 1.1                                           | (0.5–2.5) | 1.5                                                            | (0.7–2.9) | 1.1                                                                                       | (0.5–2.0) |
| 11–13 years                   | 1.4                           | (0.7–2.6) | 0.8                                                         | (0.4–1.5) | 1.1                                  | (0.6–2.1) | 1.3                                           | (0.6–2.7) | 1.7                                                            | (0.9–3.0) | 1.0                                                                                       | (0.6–1.8) |
| 14–15 years                   | 1.6                           | (0.7–3.5) | 0.7                                                         | (0.3–1.6) | 1.4                                  | (0.7–3.2) | 1.1                                           | (0.4–2.8) | 1.3                                                            | (0.6–3.0) | 0.7                                                                                       | (0.3–1.5) |
| 16+ years                     | 1.6                           | (0.7–4.0) | 0.6                                                         | (0.3–1.4) | 2.2                                  | (0.9–5.6) | 1.2                                           | (0.4–3.2) | 1.4                                                            | (0.7–2.8) | 0.6                                                                                       | (0.3–1.1) |
| 1–4 years                     | 1.0                           | —         | 1.0                                                         | —         | 1.0                                  | —         | 1.0                                           | —         | 1.0                                                            | —         | 1.0                                                                                       | —         |
| $\chi^2_4$                    | 20.7*                         |           | 8.3                                                         |           | 24.6*                                |           | 1.2                                           |           | 3.6                                                            |           | 5.9                                                                                       |           |
| Sex                           |                               |           |                                                             |           |                                      |           |                                               |           |                                                                |           |                                                                                           |           |
| Females                       | 3.5*                          | (2.2–5.6) | 3.6*                                                        | (2.2–5.8) | 3.6*                                 | (2.3–5.5) | 2.8*                                          | (1.6–4.7) | 2.8*                                                           | (1.7–4.6) | 2.5*                                                                                      | (1.4–4.3) |
| Males                         | 1.0                           | —         | 1.0                                                         | —         | 1.0                                  | —         | 1.0                                           | —         | 1.0                                                            | —         | 1.0                                                                                       | —         |
| $\chi^2_1$                    | 27.7*                         |           | 26.5*                                                       |           | 34.1*                                |           | 14.3*                                         |           | 16.0*                                                          |           | 10.7*                                                                                     |           |
| Race/ethnicity                |                               |           |                                                             |           |                                      |           |                                               |           |                                                                |           |                                                                                           |           |
| Hispanic                      | 0.6                           | (0.4–1.1) | 0.7                                                         | (0.4–1.1) | 0.5*                                 | (0.3–0.9) | 0.6                                           | (0.3–1.1) | 0.6                                                            | (0.3–1.2) | 0.7                                                                                       | (0.4–1.2) |
| Non-Hispanic Black            | 0.7                           | (0.3–1.5) | 0.8                                                         | (0.4–1.6) | 0.7                                  | (0.4–1.4) | 0.7                                           | (0.3–1.5) | 0.7                                                            | (0.3–1.6) | 0.7                                                                                       | (0.3–1.4) |
| Other                         | 1.0                           | (0.5–2.2) | 0.8                                                         | (0.4–2.0) | 0.9                                  | (0.5–1.9) | 0.9                                           | (0.3–2.6) | 0.9                                                            | (0.3–2.5) | 0.8                                                                                       | (0.3–2.3) |
| Non-Hispanic White            | 1.0                           | —         | 1.0                                                         | —         | 1.0                                  | —         | 1.0                                           | —         | 1.0                                                            | —         | 1.0                                                                                       | —         |
| $\chi^2_3$                    | 3.8                           |           | 2.5                                                         |           | 5.1                                  |           | 2.9                                           |           | 2.5                                                            |           | 2.5                                                                                       |           |
| Parent education <sup>b</sup> |                               |           |                                                             |           |                                      |           |                                               |           |                                                                |           |                                                                                           |           |
| No college                    | 1.0                           | (0.7–1.4) | 1.0                                                         | (0.7–1.4) | 0.9                                  | (0.7–1.2) | 0.9                                           | (0.6–1.4) | 1.0                                                            | (0.6–1.5) | 1.0                                                                                       | (0.6–1.4) |
| Some college                  | 1.0                           | —         | 1.0                                                         | —         | 1.0                                  | —         | 1.0                                           | —         | 1.0                                                            | —         | 1.0                                                                                       | —         |
| $\chi^2_1$                    | 0.0                           |           | 0.0                                                         |           | 0.4                                  |           | 0.1                                           |           | 0.0                                                            |           | 0.0                                                                                       |           |
| Poverty <sup>c</sup>          |                               |           |                                                             |           |                                      |           |                                               |           |                                                                |           |                                                                                           |           |
| High poverty                  | 1.3                           | (0.8–2.0) | 1.2                                                         | (0.8–1.9) | 1.2                                  | (0.8–1.8) | 1.2                                           | (0.7–2.0) | 1.1                                                            | (0.6–1.9) | 1.1                                                                                       | (0.6–1.9) |
| Low poverty                   | 1.0                           | —         | 1.0                                                         | —         | 1.0                                  | —         | 1.0                                           | —         | 1.0                                                            | —         | 1.0                                                                                       | —         |
| $\chi^2_1$                    | 1.4                           |           | 0.6                                                         |           | 0.9                                  |           | 0.4                                           |           | 0.1                                                            |           | 0.1                                                                                       |           |
| Urbanicity                    |                               |           |                                                             |           |                                      |           |                                               |           |                                                                |           |                                                                                           |           |
| Metro/other urban             | 1.1                           | (0.7–1.7) | 1.1                                                         | (0.7–1.7) | 1.3                                  | (0.9–1.8) | 1.1                                           | (0.7–1.7) | 1.2                                                            | (0.8–1.8) | 1.4                                                                                       | (0.9–2.0) |
| Rural                         | 1.0                           | —         | 1.0                                                         | —         | 1.0                                  | —         | 1.0                                           | —         | 1.0                                                            | —         | 1.0                                                                                       | —         |
| $\chi^2_1$                    | 0.2                           |           | 0.2                                                         |           | 1.7                                  |           | 0.3                                           |           | 1.1                                                            |           | 2.5                                                                                       |           |
| Biological parents in home    |                               |           |                                                             |           |                                      |           |                                               |           |                                                                |           |                                                                                           |           |
| ≤1                            | 2.0*                          | (1.3–3.0) | 1.8*                                                        | (1.2–2.6) | 1.8*                                 | (1.2–2.7) | 1.8*                                          | (1.1–2.8) | 1.5                                                            | (1.0–2.4) | 1.5                                                                                       | (0.9–2.3) |





|    | $\chi^2_{19}$                        |        |                |                |
|----|--------------------------------------|--------|----------------|----------------|
| 1  |                                      |        |                |                |
| 2  |                                      |        |                |                |
| 3  |                                      |        |                |                |
| 4  | <b>Prior Trauma<sup>f</sup></b>      | 499.0* | 557.1*         | 602.1*         |
| 5  |                                      |        |                |                |
| 6  | I. Interpersonal violence            |        |                |                |
| 7  | Kidnapped                            |        | 2.8 (0.6–12.5) | 2.4 (0.6–9.9)  |
| 8  | Physical abuse by caregiver          |        | 2.7 (0.6–11.3) | 2.9 (0.8–11.4) |
| 9  | Physical assault by romantic partner |        | 3.7 (0.4–37.5) | 4.7 (0.6–40.9) |
| 10 | Other physical assault               |        | 1.5 (0.6–3.6)  | 1.5 (0.6–3.6)  |
| 11 | Mugged/threatened with weapon        |        | 0.2 (0.0–1.4)  | 0.2 (0.0–1.4)  |
| 12 | Rape                                 |        | 1.2 (0.2–7.7)  | 1.4 (0.2–9.2)  |
| 13 | Sexual assault                       |        | 1.4 (0.5–4.2)  | 1.1 (0.4–3.2)  |
| 14 | Stalked                              |        | 2.4 (0.6–10.2) | 2.4 (0.5–12.8) |
| 15 | Witnessed domestic violence          |        | 1.7 (0.8–3.7)  | 1.6 (0.7–3.7)  |
| 16 | II. Accidents                        |        |                |                |
| 17 | Automobile accident                  |        | 1.8 (0.7–4.4)  | 1.8 (0.7–4.7)  |
| 18 | Other life-threatening accident      |        | 2.6* (1.3–5.3) | 2.8* (1.5–5.3) |
| 19 | Man-made/natural disaster            |        | 1.1 (0.7–1.9)  | 1.0 (0.6–1.8)  |
| 20 | Life-threatening illness             |        | 0.9 (0.4–2.3)  | 0.8 (0.3–2.0)  |
| 21 | Accidentally harmed others           |        | 0.4 (0.1–1.6)  | 0.5 (0.1–2.7)  |
| 22 | III. Network/witnessing              |        |                |                |
| 23 | Unexpected death of loved one        |        | 1.4 (0.7–2.7)  | 1.4 (0.7–2.9)  |
| 24 | PTE to loved one                     |        | 1.4 (0.5–3.6)  | 1.4 (0.5–3.5)  |
| 25 | Witnessed death/injury               |        | 2.1 (0.7–6.5)  | 1.3 (0.4–3.8)  |
| 26 | IV. Other                            |        |                |                |
| 27 | Other event                          |        | 2.3* (1.1–4.9) | 2.4* (1.1–5.2) |
| 28 | Private event                        |        | 1.0 (0.4–2.8)  | 0.5 (0.1–1.8)  |
| 29 | $\chi^2_{19}$                        |        | 279.7*         | 93.9*          |

Note: <sup>a</sup>Models were estimated using discrete-time survival analysis with person-years as the unit of analysis.

<sup>b</sup>Parent education was dichotomized based on highest education of either parent into high school diploma or less versus enrollment or completion of at least some post-high school education (reference group).

<sup>c</sup>Poverty was defined using household family income for the past-year relative to the federally defined poverty line based on family size. Poverty was defined as less than 3 times the poverty line and low poverty (reference group) as three or more times the poverty level.

<sup>d</sup>Variables represent counts of fear, distress, behavior, substance, and bipolar disorders with onsets prior to occurrence of respondents' self-reported worst event.

<sup>e</sup><sub>19</sub> dummy variables included to indicate the respondents' self-reported worst PTE and any other PTEs occurring in the same year as the worst event.

<sup>f</sup>Variables represent counts of PTEs occurring prior to respondents' self-reported worst event.

\*Significant at the .05 level, 2-sided test

45  
46  
47  
48  
49



|    |                                     |       |            |       |            |       |            |       |            |       |            |
|----|-------------------------------------|-------|------------|-------|------------|-------|------------|-------|------------|-------|------------|
| 1  |                                     |       |            |       |            |       |            |       |            |       |            |
| 2  |                                     |       |            |       |            |       |            |       |            |       |            |
| 3  |                                     |       |            |       |            |       |            |       |            |       |            |
| 4  | Metro/other urban                   | 0.6   | (0.2–1.5)  | 0.6   | (0.2–1.6)  | 0.7   | (0.2–1.9)  | 0.7   | (0.2–1.9)  | 0.6   | (0.2–1.7)  |
| 5  | Rural                               | 1.0   | —          | 1.0   | —          | 1.0   | —          | 1.0   | —          | 1.0   | —          |
| 6  | $\chi^2_1$                          |       | 1.3        |       | 1.0        |       | 0.5        |       | 0.6        |       | 0.9        |
| 7  | Biological parents in home          |       |            |       |            |       |            |       |            |       |            |
| 8  | ≤1                                  | 0.7   | (0.3–1.5)  | 0.7   | (0.3–1.4)  | 0.7   | (0.3–1.4)  | 0.7   | (0.4–1.4)  | 0.7   | (0.3–1.3)  |
| 9  | 2                                   | 1.0   | —          | 1.0   | —          | 1.0   | —          | 1.0   | —          | 1.0   | —          |
| 10 | $\chi^2_1$                          |       | 0.8        |       | 1.2        |       | 1.3        |       | 0.9        |       | 1.5        |
| 11 | Nativity                            |       |            |       |            |       |            |       |            |       |            |
| 12 | Foreign-born                        | 11.9* | (2.5–56.0) | 11.1* | (2.4–51.5) | 10.5* | (2.2–50.5) | 10.9* | (1.6–74.1) | 13.0* | (2.5–69.0) |
| 13 | U.S. born                           | 1.0   | —          | 1.0   | —          | 1.0   | —          | 1.0   | —          | 1.0   | —          |
| 14 | $\chi^2_1$                          |       | 9.9*       |       | 9.4*       |       | 8.6*       |       | 6.0*       |       | 9.1*       |
| 15 | Prior mental disorders <sup>c</sup> |       |            |       |            |       |            |       |            |       |            |
| 16 | Fear                                |       |            |       |            |       |            |       |            | 0.7   | (0.4–1.2)  |
| 17 | Distress                            |       |            |       |            |       |            |       |            | 1.6   | (1.0–2.7)  |
| 18 | Behavior                            |       |            |       |            |       |            |       |            | 1.5   | (0.9–2.5)  |
| 19 | Substance                           |       |            |       |            |       |            |       |            | 2.5   | (0.6–10.3) |
| 20 | Bipolar disorder                    |       |            |       |            |       |            |       |            | 0.0*  | (0.0–0.3)  |
| 21 | $\chi^2_5$                          |       |            |       |            |       |            |       |            |       | 17.0*      |
| 22 | Worst event category <sup>d</sup>   |       |            |       |            |       |            |       |            |       |            |
| 23 | Interpersonal Violence              |       |            | 1.2   | (0.5–3.2)  | 1.3   | (0.5–3.7)  | 1.4   | (0.5–3.9)  | 1.4   | (0.5–4.5)  |
| 24 | Accidents                           |       |            | 1.7   | (0.3–8.6)  | 2.0   | (0.3–12.2) | 2.0   | (0.3–12.1) | 2.2   | (0.3–14.2) |
| 25 | Network/Witnessing                  |       |            | 0.6   | (0.2–2.4)  | 0.6   | (0.1–3.4)  |       |            | 0.9   | (0.1–6.1)  |
| 26 | Other                               |       |            |       |            |       |            | 0.6   | (0.1–3.4)  |       |            |
| 27 | $\chi^2_4$                          |       |            |       | 1.0        |       | 1.1        |       | 1.0        |       | 0.9        |
| 28 | Prior PTEs <sup>e</sup>             |       |            |       |            |       |            |       |            |       |            |
| 29 | Interpersonal Violence              |       |            |       |            | 1.0   | (0.6–1.6)  | 1.0   | (0.6–1.6)  | 1.0   | (0.6–1.7)  |
| 30 | Accidents                           |       |            |       |            | 1.2   | (0.6–2.2)  | 1.3   | (0.7–2.5)  | 1.5   | (0.8–2.8)  |
| 31 | Network/Witnessing                  |       |            |       |            | 0.3   | (0.1–1.1)  | 0.3   | (0.1–1.3)  | 0.3   | (0.1–1.4)  |
| 32 | Other                               |       |            |       |            | 1.7   | (0.4–7.9)  | 1.5   | (0.3–7.2)  | 1.2   | (0.2–6.6)  |
| 33 | $\chi^2_4$                          |       |            |       |            |       | 3.8        |       | 3.6        |       | 4.7        |
| 34 | Subsequent PTEs <sup>f</sup>        |       |            |       |            |       |            |       |            |       |            |
| 35 | Interpersonal Violence              |       |            |       |            |       |            | 0.8   | (0.4–1.5)  | 0.8   | (0.4–1.5)  |
| 36 | Accidents                           |       |            |       |            |       |            | 0.9   | (0.1–8.5)  | 0.9   | (0.2–4.1)  |
| 37 | Network/Witnessing                  |       |            |       |            |       |            | 1.0   | (0.4–2.3)  | 1.1   | (0.5–2.5)  |
| 38 | Other                               |       |            |       |            |       |            | 0.3   | (0.0–1.8)  | 0.2*  | (0.0–0.6)  |
| 39 | $\chi^2_4$                          |       |            |       |            |       |            |       | 5.6        |       | 12.6*      |

Note: <sup>a</sup>Models were estimated using discrete-time survival analysis with person-years as the unit of analysis. Only respondents with lifetime PTSD were included in the analysis.

1  
2  
3  
4  
5  
6  
7  
8  
9  
10  
11  
12  
13  
14  
15  
16  
17  
18  
19  
20  
21  
22  
23  
24  
25  
26  
27  
28  
29  
30  
31  
32  
33  
34  
35  
36  
37  
38  
39  
40  
41  
42  
43  
44  
45  
46  
47  
48  
49

<sup>b</sup>Poverty was defined using household family income for the past-year relative to the federally defined poverty line based on family size. Poverty was defined as less than 3 times the poverty line and low poverty (reference group) as three or more times the poverty level.

<sup>c</sup>Variables represent counts of fear, distress, behavior, substance, and bipolar disorders with onsets prior to occurrence of respondents' self-reported worst event.

<sup>d</sup>Variables represent worst event types: interpersonal violence, accidents, network/witnessing, and other events.

<sup>e</sup>Variables represent counts of PTEs occurring prior to respondents' self-reported worst event within each of the four trauma categories: interpersonal violence, accidents, network/witnessing, and other events.

<sup>f</sup>Variables represent counts of PTEs occurring after the respondents' self-reported worst event within each of the four trauma categories: interpersonal violence, accidents, network/witnessing, and other events.

\*Significant at the .05 level, 2-sided test
